# Supplementary material for: In Vivo Safety and Persistence of Endoribonuclease Gene-Transduced CD4+ T Cells in Cynomolgus Macaques for HIV-1 Gene Therapy Model
Source: PubMed Central journal article supplement (PMC3157387; doi:10.1371/journal.pone.0023585), 2011-08-17
Supplement: pone.0023585.s001.pdf [file pone.0023585.s001.pdf]

| IgG standard |                |
|--------------|----------------|
| IgG (ng/mL)  | Abs 490/650 nm |
| 64           | 1.197          |
|              | 1.168          |
| 32           | 0.756          |
|              | 0.764          |
| 16           | 0.439          |
|              | 0.445          |
| 8            | 0.237          |
|              | 0.232          |
| 4            | 0.12           |
|              | 0.129          |
| 2            | 0.064          |
|              | 0.069          |
| 1            | 0.051          |
|              | 0.052          |

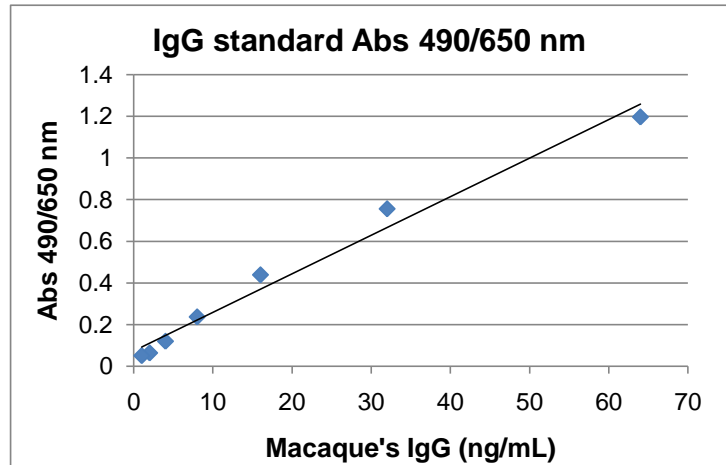

| anti-monkey IgG coated plate |                         |                |
|------------------------------|-------------------------|----------------|
| day after trasnplantation    | Fold dilution of plasma | Abs 490/650 nm |
| 0                            | 100000                  | 0.994          |
|                              |                         | 0.999          |
|                              | 500000                  | 0.290          |
|                              |                         | 0.290          |
| 33                           | 100000                  | 0.984          |
|                              |                         | 1.014          |
|                              | 500000                  | 0.271          |
|                              |                         | 0.274          |
| 75                           | 100000                  | 0.996          |
|                              |                         | 1.041          |
|                              | 500000                  | 0.288          |
|                              |                         | 0.294          |
| 89                           | 100000                  | 1.036          |
|                              |                         | 1.004          |
|                              | 500000                  | 0.280          |
|                              |                         | 0.294          |
| 103                          | 100000                  | 1.129          |
|                              |                         | 1.156          |
|                              | 500000                  | 0.341          |
|                              |                         | 0.346          |

| MazF coated plate         |                         |                |
|---------------------------|-------------------------|----------------|
| day after trasnplantation | Fold dilution of plasma | Abs 490/650 nm |
| 0                         | 10000                   | 0.022          |
|                           |                         | 0.006          |
|                           | 50000                   | 0.006          |
|                           |                         | 0.010          |
|                           | 100000                  | 0.006          |
|                           |                         | 0.010          |
| 33                        | 10000                   | -0.001         |
|                           |                         | 0.001          |
|                           | 50000                   | 0.013          |
|                           |                         | 0.007          |
|                           | 100000                  | 0.003          |
|                           |                         | 0.007          |
| 75                        | 10000                   | -0.005         |
|                           |                         | -0.002         |
|                           | 50000                   | -0.001         |
|                           |                         | -0.004         |
|                           | 100000                  | 0.012          |
|                           |                         | 0.021          |
| 89                        | 10000                   | 0.009          |
|                           |                         | 0.005          |
|                           | 50000                   | 0.003          |
|                           |                         | 0.003          |
|                           | 100000                  | 0.000          |
|                           |                         | 0.001          |
| 103                       | 10000                   | 0.018          |
|                           |                         | 0.019          |
|                           | 50000                   | 0.013          |
|                           |                         | 0.017          |
|                           | 100000                  | 0.007          |
|                           |                         | 0.009          |
| 500000                    | 10000                   | 0.006          |
|                           |                         | 0.008          |
|                           | 50000                   | -0.005         |
|                           |                         | -0.001         |
|                           | 100000                  | 0.007          |
|                           |                         | 0.004          |
| 500000                    | 0.005                   |                |
|                           | 0.002                   |                |

Figure S1 Raw data of absorbance 490/650nm for Figure 3
