# Supplementary material for: In Vivo Safety and Persistence of Endoribonuclease Gene-Transduced CD4+ T Cells in Cynomolgus Macaques for HIV-1 Gene Therapy Model
Source: PubMed Central journal article supplement (PMC3157387; doi:10.1371/journal.pone.0023585), 2011-08-17
Supplement: pone.0023585.s002.pdf [file pone.0023585.s002.pdf]

**CD4T-1**

**CD4T-2**

**CD4T-3**

**Lymph node**

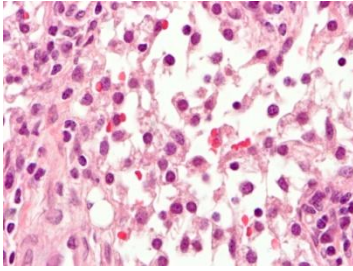

$\pm$ : Hemorrhage in sinus

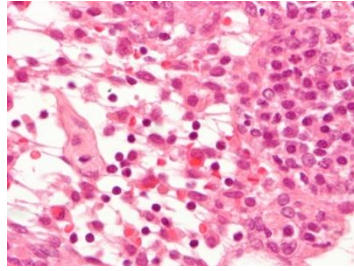

$\pm$ : Hemorrhage in sinus

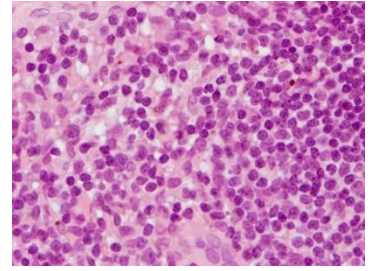

**Spleen**

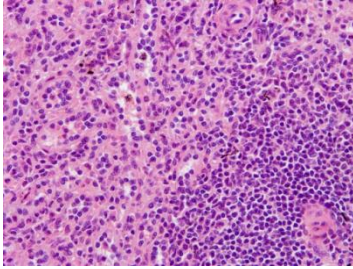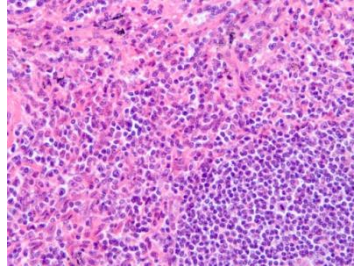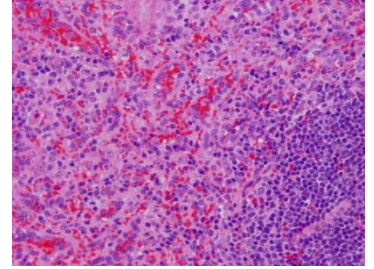

**+**: Congestion

**Bone Marrow**

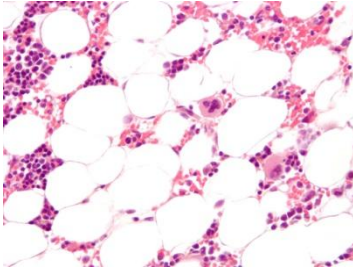

**++**: Decrease of hematopoiesis

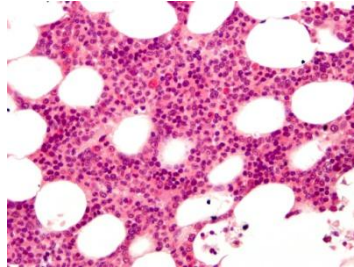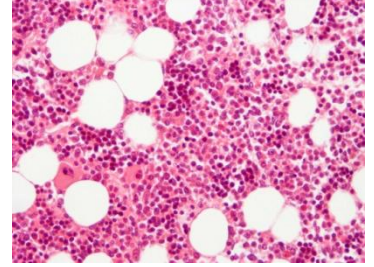

**Thymus**

**N/A**

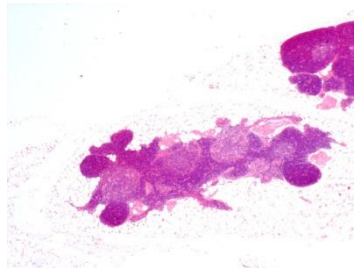

**+**: Involution

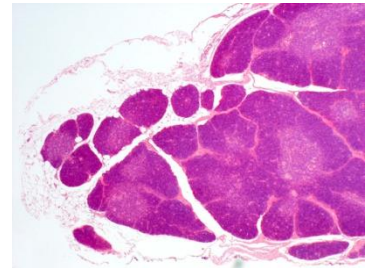

**Small Intestine**

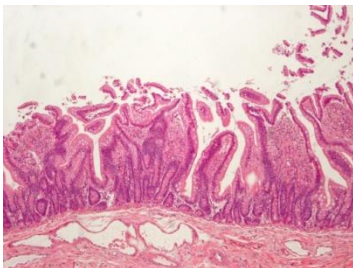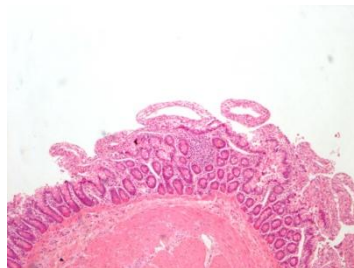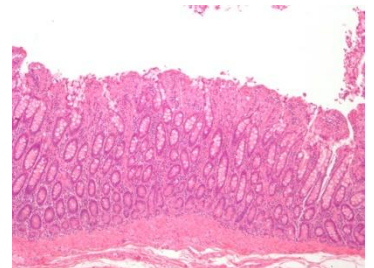

Figure S2 Photographs of histopathological analysis.

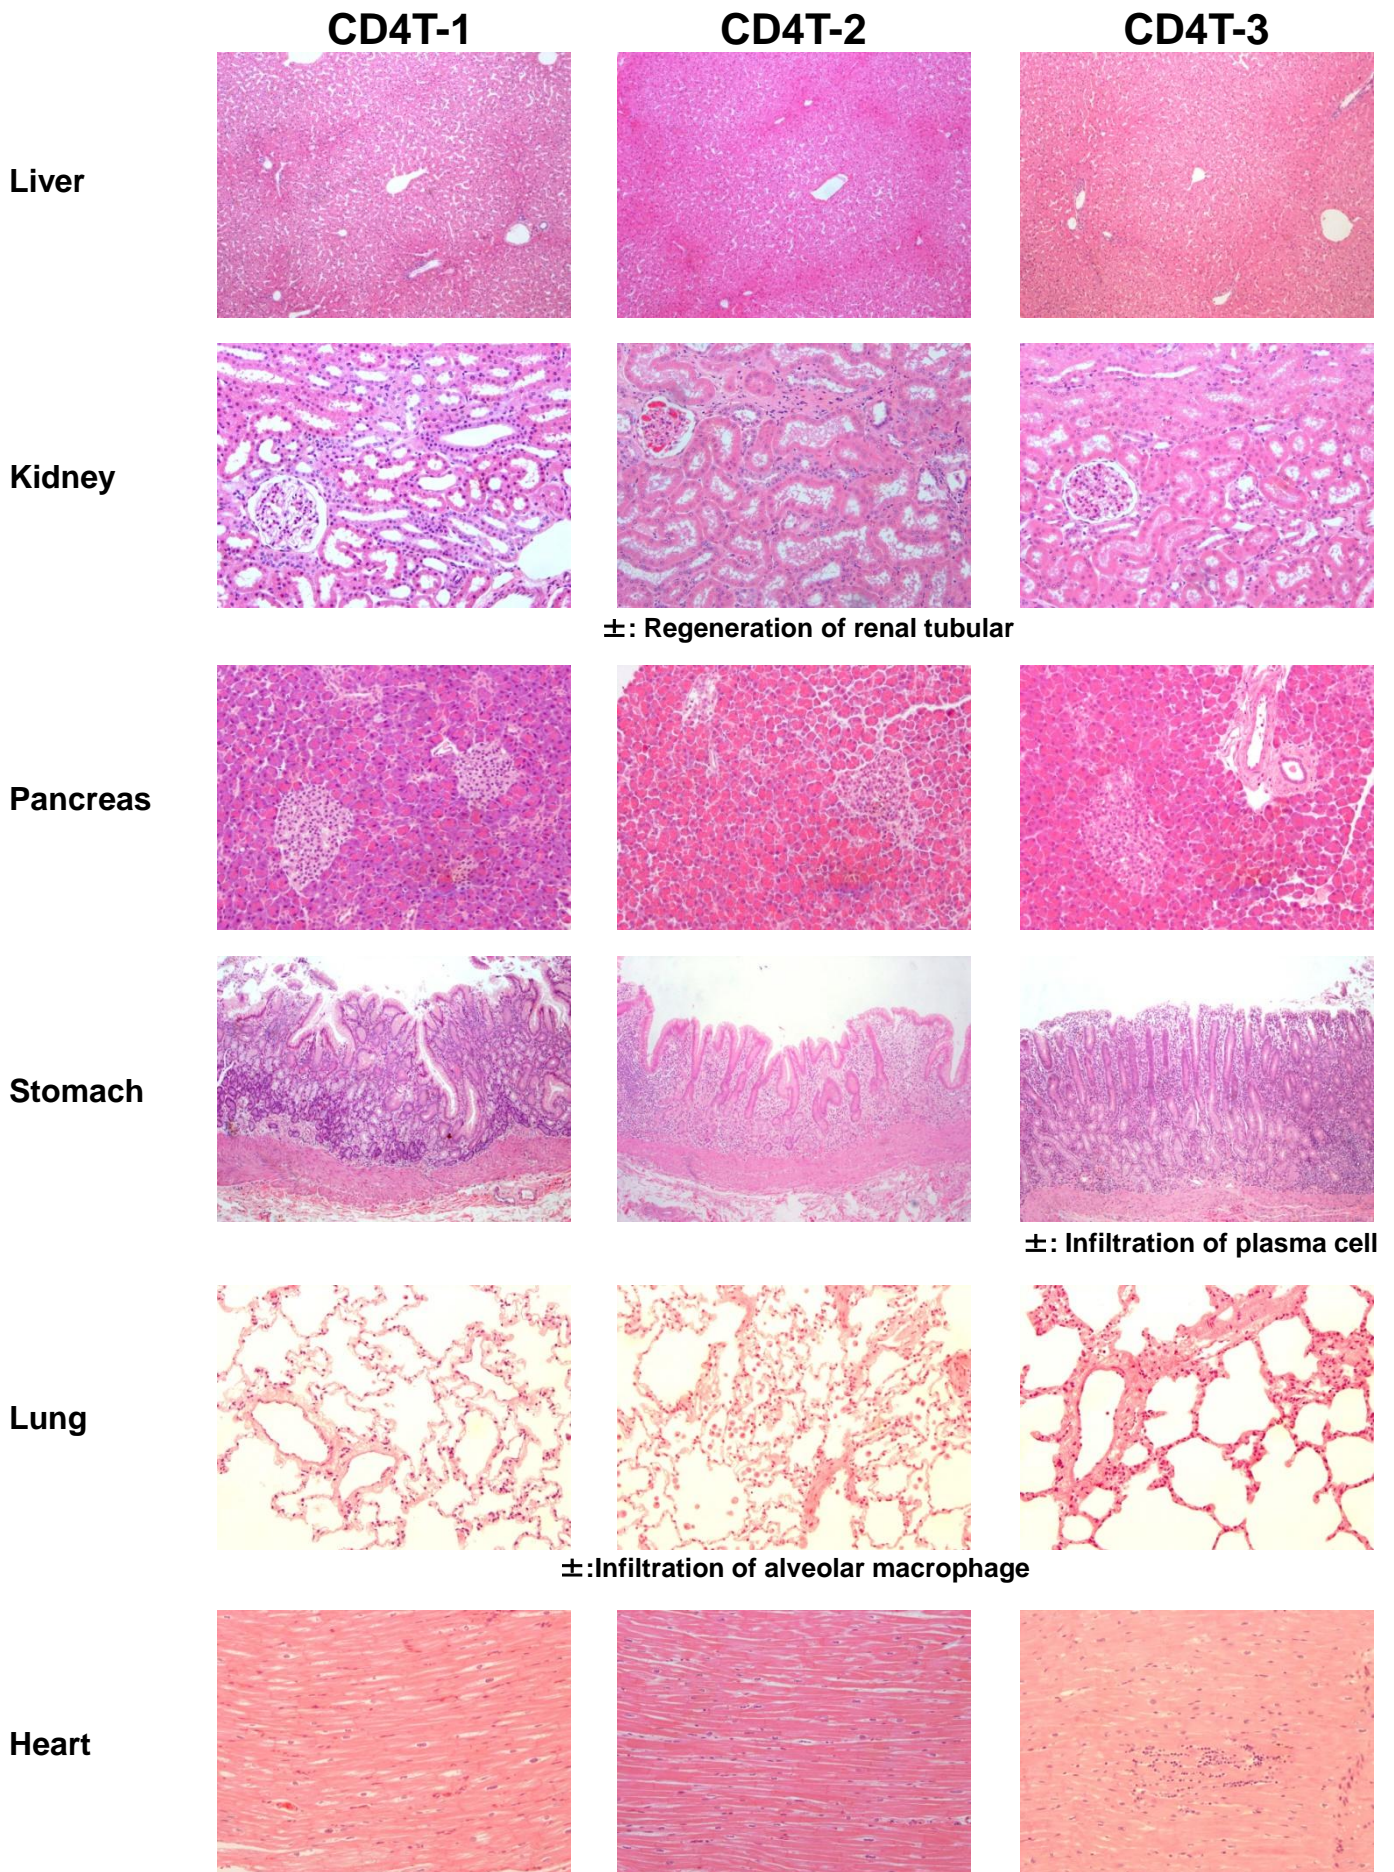

Figure S2 Photographs of histopathological analysis.
